# Supplementary material
Source: Research Square preprint supplement (doi:10.21203/rs.3.rs-8873829/v1)
Supplement: Supplementary file 1 [file 049775af6a56b495bcd4eb3c.xlsx]

## Sheet: Fig. 2b
Antimicrobial testing - Clostridioides difficile
			MIC (mg/l)
Strain no.	Ribotype	Clade	Clindamycin	Clincelin
7223	001-like	Clade_1	4	0.125
7226	014	Clade_1	4	0.125
7217	014	Clade_1	2	0.125
7218	014	Clade_1	2	0.125
7219	014	Clade_1	2	0.125
6729	500	Clade_1	2	0.125
7213	014	Clade_1	4	0.25
5664	739	Clade_1	4	0.25
6860	002	Clade_1	8	0.5
7194	009-like	Clade_1	8	0.5
7211	014	Clade_1	8	0.5
7212	014	Clade_1	8	0.5
7215	014	Clade_1	8	0.5
7216	014	Clade_1	8	0.5
6646	711	Clade_1	8	0.5
7196	014	Clade_1	16	1
5424	739	Clade_1	16	1
6730	018	Clade_1	1	0.125
6863	014	Clade_1	2	0.25
6687	440	Clade_1	2	0.25
6702	001	Clade_1	4	0.5
6615	002	Clade_1	4	0.5
6643	106	Clade_1	4	0.5
7202	449	Clade_1	4	0.5
6862	002	Clade_1	8	1
6645	NR	Clade_1	8	1
7193	020	Clade_1	16	2
7224	001-like	Clade_1	0.5	0.125
7220	014	Clade_1	0.5	0.125
7221	020	Clade_1	0.5	0.125
6574	001	Clade_1	2	0.5
6861	001	Clade_1	4	1
6641	020	Clade_1	4	1
6573	081	Clade_1	4	1
6642	081	Clade_1	4	1
7201	449	Clade_1	4	1
5860	002	Clade_1	8	2
7207	014	Clade_1	8	2
6800	500	Clade_1	8	2
5867	739	Clade_1	8	2
5855	651	Clade_1	0.25	0.125
7222	020	Clade_1	1	0.5
7195	014	Clade_1	2	1
7214	014	Clade_1	4	2
4722	176	Clade_2	16	0.5
1174	176	Clade_2	4	0.25
5401	176	Clade_2	8	0.5
6798	176	Clade_2	2	0.25
6795	176	Clade_2	4	0.5
6688	027	Clade_2	16	2
6731	027	Clade_2	0.5	0.125
4993	176	Clade_2	0.5	0.125
5030	176	Clade_2	1	0.25
6614	176	Clade_2	2	0.5
6732	027	Clade_2	4	1
6649	176	Clade_2	4	1
6708	176	Clade_2	4	1
6797	176	Clade_2	4	1
5541	176	Clade_2	4	1
6853	176	Clade_2	16	4
6747	176	Clade_2	16	4
4352	176	Clade_2	16	4
4563	176	Clade_2	16	4
6640	176	Clade_2	4	2
7529	023	Clade_3	4	0.125
7470	023	Clade_3	2	0.125
7499	023	Clade_3	2	0.125
7384	023	Clade_3	1	0.125
7460	023	Clade_3	1	0.125
7667	023	Clade_3	1	0.125
6607	023	Clade_3	8	1
6791	023	Clade_3	0.5	0.125
6813	023	Clade_3	0.5	0.125
7445	023	Clade_3	0.5	0.125
7230	023	Clade_3	0.5	0.125
7638	023	Clade_3	0.5	0.125
6189	023	Clade_3	0.5	0.125
6211	023	Clade_3	0.5	0.125
6226	023	Clade_3	0.5	0.125
6507	023	Clade_3	0.5	0.125
6246	023	Clade_3	0.5	0.125
6432	023	Clade_3	1	0.25
6551	023	Clade_3	0.5	0.25
7359	438	Clade_3	0.5	0.5
5794	017	Clade_4	16	1
6584	017	Clade_4	8	1
7531	017	Clade_4	8	1
7546	017	Clade_4	8	1
5794	017	Clade_4	16	2
3630	017	Clade_4	0.5	0.125
7531	017	Clade_4	0.5	0.125
6058	047	Clade_4	0.5	0.125
7546	017	Clade_4	1	0.25
8	017	Clade_4	16	4
3414	017	Clade_4	8	4
340	017	Clade_4	8	4
3946	085	Clade_4	8	4
7435	085-like	Clade_4	4	4
7205	NR	Clade_5	2	0.125
6578	413	Clade_5	4	0.25
6586	413	Clade_5	8	0.5
2986	033	Clade_5	1	0.125
3654	033	Clade_5	4	0.5
7192	078	Clade_5	8	1
6755	078	Clade_5	16	2
7206	NR	Clade_5	16	2
6575	078	Clade_5	0.5	0.125
6201	078	Clade_5	2	0.5
5312	033	Clade_5	4	1
5320	033	Clade_5	4	1
6202	078	Clade_5	4	1
6895	078	Clade_5	4	1
6455	078	Clade_5	8	2
7291	078	Clade_5	16	4
6691	126	Clade_5	16	4
6208	078	Clade_5	2	1
7175	078	Clade_5	4	2
6427	078	Clade_5	8	4

## Sheet: Fig. 2b stat
Welch Two Sample t-test – comparison Clade1 MIC Clincelin vs Clade1 MIC Clindamycin, …
Clade1 (n=44)
t = -7.3775, df = 45.023, p-value = 2.809e-09
alternative hypothesis: true difference in means is not equal to 0
95 percent confidence interval:
-5.695965 -3.252899
sample estimates:
mean of x mean of y
0.7017045 5.1761364
Adjusted p-value 1.4045e-08 (Bonferroni method)
Clade2 (n=20)
data: a1.2 and a4.2
t = -4.0086, df = 21.027, p-value = 0.0006351
alternative hypothesis: true difference in means is not equal to 0
95 percent confidence interval:
-8.656837 -2.743163
sample estimates:
mean of x mean of y
1.4 7.1
Adjusted p-value 0.0031755 (Bonferroni method)
Clade3 (n=20)
data: a1.3 and a4.3
t = -2.7227, df = 19.512, p-value = 0.0133
alternative hypothesis: true difference in means is not equal to 0
95 percent confidence interval:
-1.9441019 -0.2558981
sample estimates:
mean of x mean of y
0.2 1.3
Adjusted p-value 0.0665 (Bonferroni method)
Clade4 (n=14)
data: a1.4 and a4.4
t = -3.421, df = 15.305, p-value = 0.003697
alternative hypothesis: true difference in means is not equal to 0
95 percent confidence interval:
-8.790482 -2.048804
sample estimates:
mean of x mean of y
1.901786 7.321429
Adjusted p-value 0.018485 (Bonferroni method)
Clade5 (n=20)
data: a1.5 and a4.5
t = -4.2131, df = 21.193, p-value = 0.0003838
alternative hypothesis: true difference in means is not equal to 0
95 percent confidence interval:
-7.718675 -2.618825
sample estimates:
mean of x mean of y
1.40625 6.57500
Adjusted p-value 0.001919 (Bonferroni method)

## Sheet: Fig. 3c,d
Source data for Fig. 3C, D. Uncropped gels

## Sheet: Fig. 4a
TXTL
1. Table with % activity at 8h for each antibiotic. for each repetitions
[ Antibiotics ] uM	Celesticetin				Lincomycin				Clindamycin				OD-Celin				Clincelin
	exp1	exp2	exp10	exp11	exp1	exp2	exp10	exp11	exp1	exp2	exp10	exp11	exp1	exp2	exp10	exp11	exp1	exp2	exp10	exp11
0	100	100			100	100	100	100	100	100	100	100	100	100	100	100	100	100	100	100
0.001	120.02	125.93			114.29	102.93	95.26	91.96	103.68	96.08	91.87	96.45	89.83	95.08	94.75	108.81	78.83	92.01	98.36	106.83
0.01	115.82	116.45			100.95	86.54	96.74	90.19	96.81	92.56	97.95	90.15	81.9	91.44	91.06	102.04	83.2	98.06	100.76	107.21
0.1	109.54	103.2			60.87	56.48	67.18	68.07	63.44	58.56	56.44	58.98	69.08	72.74	91.94	89.65	89.77	92.91	100.03	98.45
1	38.79	31.1			-0.52	-0.95	6.29	4.74	0.69	-2.46	0.22	3.32	-2.24	-1.76	1.2	5.19	21.77	22.47	8.85	9.49
10	1.18	2.63			-1.18	-0.22	2.47	-0.88	-2.94	-0.65	0.33	1.75	-3.20	2.37	-0.04	3.99	-4.83	1.49	4.07	4.64
100	3.25	7.21			-0.87	0.51	-0.71	2.85	-2.50	-0.27	-0.35	2.09	0.45	1.26	-0.60	4.92	-2.09	-1.72	2.32	7.83
1000					0.24	2.51	0.12	1.47	2.51	0.69	1.3	0.02	3.57	2.79	2.19	7.57	-2.67	-5.22	0.61	1.45
2. Table with IC50 + SEM at 8h for each repetition
	Celesticetin			Lincomycin			Clindamycin			OD-Celin			Clincelin
	IC50	SEM	N	IC50	SEM	N	IC50	SEM	N	IC50	SEM	N	IC50	SEM	N
exp1	0.839	0.398	7	0.137	0.04	8	0.143	0.03	8	0.143	0.048	8	0.375	0.159	8
exp2	0.666	0.368	7	0.106	0.02	8	0.116	0.023	8	0.172	0.048	8	0.434	0.107	8
exp10				0.171	0.025	8	0.117	0.023	8	0.273	0.113	8	0.373	0.152	8
exp11				0.163	0.033	8	0.123	0.016	8	0.294	0.114	8	0.377	0.163	8
3. Analyzing the data with regression curve: [Inhibitor] vs. normalized response
Celesticetin			Lincomycin			Clindamycin			OD-Celin			Clincelin
IC50	SEM	N	IC50	SEM	N	IC50	SEM	N	IC50	SEM	N	IC50	SEM	N
0.743	0.272	7	0.142	0.015	8	0.125	0.011	8	0.216	0.039	8	0.388	0.071	8
4. One-way Anova followed by Tukey's multiple comparisons test:
Tukey's multiple comparisons test		Mean Diff.	95.00% CI of diff.	Below threshold?	Summary	Adjusted P Value
Celesticetin vs. Lincomycin		0.6009	0.1222 to 1.080	Yes	**	0.008003
Celesticetin vs. Clindamycin		0.6183	0.1396 to 1.097	Yes	**	0.006051
Celesticetin vs. OD-Celin		0.527	0.04829 to 1.006	Yes	*	0.025002
Celesticetin vs. Clincelin		0.3552	-0.1235 to 0.8339	No	ns	0.228586
Lincomycin vs. Clindamycin		0.0174	-0.4451 to 0.4799	No	ns	0.999967
Lincomycin vs. OD-Celin		-0.07388	-0.5364 to 0.3886	No	ns	0.990367
Lincomycin vs. Clincelin		-0.2457	-0.7082 to 0.2168	No	ns	0.55092
Clindamycin vs. OD-Celin		-0.09128	-0.5538 to 0.3712	No	ns	0.978783
Clindamycin vs. Clincelin		-0.2631	-0.7256 to 0.1994	No	ns	0.484322
OD-Celin vs. Clincelin		-0.1718	-0.6343 to 0.2907	No	ns	0.82049

## Sheet: Fig. 4b
Binding assay
Repetition 1
		Replicate 1		Replicate 2				Replicate 1		Replicate 2
		Quantity (uM)of released lincomycin	AVG	Quantity (uM)of released lincomycin	AVG			Quantity (uM)of released lincomycin	AVG	Quantity (uM)of released lincomycin	AVG
	Lincomycin	1.09518	1.10582	1.10289	1.10209		Lincomycin	1.16598	1.13183	1.18269	1.17573
	Lincomycin	1.08967		1.151			Lincomycin	1.14947		1.12012
	Lincomycin	1.12694		1.11013			Lincomycin	1.16884		1.13417
	Lincomycin	1.08824		1.02383			Lincomycin	1.12771		1.18452
	Lincomycin	1.12905		1.12259			Lincomycin	1.04713		1.25714
	Lincomycin+Ribosome	0.0108177	0.010154	0.0134076	0.0136735		Lincomycin+Ribosome	0.0125469	0.0138415	0.0101437	0.010593
	Lincomycin+Ribosome	0.0101211		0.0139394			Lincomycin+Ribosome	0.0108302		0.0113935
	Lincomycin+Ribosome	0.00890052		#VALUE!			Lincomycin+Ribosome	0.0163444		0.011134
	Lincomycin+Ribosome	0.0100847		#VALUE!			Lincomycin+Ribosome	0.0143271		0.0114585
	Lincomycin+Ribosome	0.0108474		#VALUE!			Lincomycin+Ribosome	0.0151587		0.0088346
	Lincomycin+1 nM clindamycin	0.0153043	0.012573	0.0194661	0.0174686		Lincomycin+1 nM clincelin	0.0113187	0.0105324	0.00980327	0.00959
	Lincomycin+1 nM clindamycin	0.0115709		0.0168924			Lincomycin+1 nM clincelin	0.0103626		0.0102581
	Lincomycin+1 nM clindamycin	0.0119622		0.0168447			Lincomycin+1 nM clincelin	0.00815348		0.00940355
	Lincomycin+1 nM clindamycin	0.0119635		0.0170257			Lincomycin+1 nM clincelin	0.0106612		0.00972849
	Lincomycin+1 nM clindamycin	0.0120653		0.017114			Lincomycin+1 nM clincelin	0.0121661		0.00875761
	Lincomycin+10 nM clindamycin	0.0129742	0.011219	0.0105574	0.0110923		Lincomycin+10 nM clincelin	0.0239515	0.0266189	0.0112373	0.010201
	Lincomycin+10 nM clindamycin	0.00878762		0.0112002			Lincomycin+10 nM clincelin	0.026611		0.011409
	Lincomycin+10 nM clindamycin	0.0122968		0.0113392			Lincomycin+10 nM clincelin	0.0280331		0.0108029
	Lincomycin+10 nM clindamycin	0.00999218		0.0123334			Lincomycin+10 nM clincelin	0.0259366		0.00793333
	Lincomycin+10 nM clindamycin	0.0120422		0.0100313			Lincomycin+10 nM clincelin	0.0285624		0.00962124
	Lincomycin+100 nM clindamycin	0.0140767	0.015272	0.0111505	0.0104658		Lincomycin+100 nM clincelin	0.0297106	0.0295727	0.0216669	0.019949
	Lincomycin+100 nM clindamycin	0.0169785		0.00969479			Lincomycin+100 nM clincelin	0.0307314		0.0171704
	Lincomycin+100 nM clindamycin	0.0149981		0.0103466			Lincomycin+100 nM clincelin	0.0296843		0.0206202
	Lincomycin+100 nM clindamycin	0.0166152		0.0110123			Lincomycin+100 nM clincelin	0.029366		0.0206399
	Lincomycin+100 nM clindamycin	0.0136912		0.0101248			Lincomycin+100 nM clincelin	0.0283713		0.0196491
	Lincomycin+1 uM clindamycin	0.0312384	0.031951	0.0183245	0.017903		Lincomycin+1 uM clincelin	0.0257317	0.0258195	0.0173718	0.019506
	Lincomycin+1 uM clindamycin	0.0387095		0.0160015			Lincomycin+1 uM clincelin	0.0253811		0.0202847
	Lincomycin+1 uM clindamycin	0.0299805		0.0175588			Lincomycin+1 uM clincelin	0.0276614		0.0174075
	Lincomycin+1 uM clindamycin	0.0291358		0.0212467			Lincomycin+1 uM clincelin	0.0253046		0.0244558
	Lincomycin+1 uM clindamycin	0.0306889		0.0163835			Lincomycin+1 uM clincelin	0.0250186		0.0180089
	Lincomycin+10 uM clindamycin	0.0388729	0.039184	0.0664555	0.0612976		Lincomycin+10 uM clincelin	0.0198643	0.0208539	0.0184236	0.019288
	Lincomycin+10 uM clindamycin	0.0418074		0.0606184			Lincomycin+10 uM clincelin	0.0197012		0.0196434
	Lincomycin+10 uM clindamycin	0.0432235		0.0621413			Lincomycin+10 uM clincelin	0.0209338		0.0230116
	Lincomycin+10 uM clindamycin	0.0323542		0.0633798			Lincomycin+10 uM clincelin	0.0220484		0.0196948
	Lincomycin+10 uM clindamycin	0.0396642		0.0538931			Lincomycin+10 uM clincelin	0.0217217		0.0156682
	Lincomycin+100 uM clindamycin	0.230296	0.228197	0.228374	0.23231		Lincomycin+100 uM clincelin	0.0260288	0.0237477	0.0214408	0.018508
	Lincomycin+100 uM clindamycin	0.235332		0.231926			Lincomycin+100 uM clincelin	0.0238408		0.0177477
	Lincomycin+100 uM clindamycin	0.234128		0.235666			Lincomycin+100 uM clincelin	0.0245276		0.0200183
	Lincomycin+100 uM clindamycin	0.221833		0.243778			Lincomycin+100 uM clincelin	0.0202239		0.015432
	Lincomycin+100 uM clindamycin	0.219396		0.221807			Lincomycin+100 uM clincelin	0.0241173		0.0179014
	Lincomycin+1 mM clindamycin	1.47902	1.60639	1.7252	1.65363		Lincomycin+1 mM clincelin	0.0192385	0.0209945	0.0173738	0.015528
	Lincomycin+1 mM clindamycin	1.63332		1.65666			Lincomycin+1 mM clincelin	0.0230451		0.0142373
	Lincomycin+1 mM clindamycin	1.70185		1.59845			Lincomycin+1 mM clincelin	0.0220046		0.0156352
	Lincomycin+1 mM clindamycin	1.60119		1.65624			Lincomycin+1 mM clincelin	0.0208596		0.0156384
	Lincomycin+1 mM clindamycin	1.61659		1.63158			Lincomycin+1 mM clincelin	0.019825		0.0147543
Repetition 2		Replicate 1		Replicate 2				Replicate 1		Replicate 2
		Quantity (uM)of released lincomycin	AVG	Quantity (uM)of released lincomycin	AVG			Quantity (uM)of released lincomycin	AVG	Quantity (uM)of released lincomycin	AVG
	Lincomycin	0.160889	0.166184	0.190429	0.184993		Lincomycin	0.133332	0.146197	0.187073	0.181716
	Lincomycin	0.175149		0.175422			Lincomycin	0.150614		0.17999
	Lincomycin	0.162515		0.189126			Lincomycin	0.154645		0.178085
	Lincomycin+Ribosome	#VALUE!	#VALUE!	0.0442128	0.0470414		Lincomycin+Ribosome	#VALUE!	#VALUE!	0.00195554	0.002025
	Lincomycin+Ribosome	#VALUE!		0.0509896			Lincomycin+Ribosome	#VALUE!		0.00205467
	Lincomycin+Ribosome	#VALUE!		0.0459219			Lincomycin+Ribosome	#VALUE!		0.00206574
	Lincomycin+1 nM clindamycin	0.0061239	0.006169	0.00133001	0.00152056		Lincomycin+1 nM clincelin	0.00492279	0.0045918	0.00237223	0.00258
	Lincomycin+1 nM clindamycin	0.00597755		0.00131328			Lincomycin+1 nM clincelin	#VALUE!		0.00244577
	Lincomycin+1 nM clindamycin	0.0064058		0.00191839			Lincomycin+1 nM clincelin	0.00426086		0.00292322
	Lincomycin+10 nM clindamycin	0.00447092	0.004417	0.00855763	#VALUE!		Lincomycin+10 nM clincelin	0.0050903	0.0061297	0.00238969	0.00253
	Lincomycin+10 nM clindamycin	0.00443452		#VALUE!			Lincomycin+10 nM clincelin	0.00704534		0.00240174
	Lincomycin+10 nM clindamycin	0.00434523		0.00704387			Lincomycin+10 nM clincelin	0.00625354		0.002799
	Lincomycin+100 nM clindamycin	0.00626141	0.006923	0.0071339	0.00625403		Lincomycin+100 nM clincelin	0.00476438	0.0049269	0.0074672	0.006941
	Lincomycin+100 nM clindamycin	0.00692555		0.00458432			Lincomycin+100 nM clincelin	0.00505783		0.00692973
	Lincomycin+100 nM clindamycin	0.00758256		#VALUE!			Lincomycin+100 nM clincelin	0.00495845		0.00642572
	Lincomycin+1 uM clindamycin	0.0102492	0.010886	0.00915806	0.00875031		Lincomycin+1 uM clincelin	0.00799999	0.0081931	0.00754001	0.008126
	Lincomycin+1 uM clindamycin	0.0117337		0.00886559			Lincomycin+1 uM clincelin	0.00915782		0.0093118
	Lincomycin+1 uM clindamycin	0.0106745		0.00822727			Lincomycin+1 uM clincelin	0.00742145		0.00752623
	Lincomycin+10 uM clindamycin	0.0585387	0.06198	0.0602197	0.0577366		Lincomycin+10 uM clincelin	0.00529594	0.0069085	0.00404907	0.003626
	Lincomycin+10 uM clindamycin	0.0613094		0.055903			Lincomycin+10 uM clincelin	0.00742243		0.00335024
	Lincomycin+10 uM clindamycin	0.0660925		0.0570872			Lincomycin+10 uM clincelin	0.00800712		0.00347963
	Lincomycin+100 uM clindamycin	0.190957	0.202634	0.363702	0.363702		Lincomycin+100 uM clincelin	0.0056258	0.0058933	0.00563072	0.007344
	Lincomycin+100 uM clindamycin	0.203434		#VALUE!			Lincomycin+100 uM clincelin	0.00660676		0.00886264
	Lincomycin+100 uM clindamycin	0.213511		#VALUE!			Lincomycin+100 uM clincelin	0.00544722		0.00753976
	Lincomycin+1 mM clindamycin	#VALUE!		#VALUE!			Lincomycin+1 mM clincelin	0.00836109	0.0080403	0.00609439	0.005886
	Lincomycin+1 mM clindamycin	#VALUE!		#VALUE!			Lincomycin+1 mM clincelin	0.00703649		0.0068584
	Lincomycin+1 mM clindamycin	#VALUE!		#VALUE!			Lincomycin+1 mM clincelin	0.00872342		0.0047046
	Combining data of repeatition
	Clindamycin samples (release of lincomycin (uM)									Clincelin samples (release of lincomycin (uM)
	log10 ATB (M)	ATB conc (M)	Rep1	Rep 2	Rep1	Rep 2	Mean	Std dev		Rep1	Rep 2	Rep1	Rep 2	Mean	Std dev
			1.10582	1.10209	0.17	0.184993	0.63977	0.536048		1.13183	1.17573	0.146197	0.181716	0.658868	0.571939
		0	0.010154	0.0136735	#VALUE!	0.0470414	0.0236231	0.0203571		0.0138415	0.010593	#VALUE!	0.002025	0.00882	0.006104
	-9	1e-09	0.012573	0.0174686	0.01	0.0015206	0.00943287	0.00701644		0.0105324	0.00959	0.004592	0.00258	0.006824	0.003847
	-8	1e-08	0.011219	0.0110923	0.00441689	#VALUE!	0.00890926	0.00389102		0.0266189	0.010201	0.00613	0.00253	0.01137	0.010638
	-7	1e-07	0.015272	0.0104658	0.00692317	0.006254	0.00972873	0.00413179		0.0295727	0.019949	0.004927	0.006941	0.015347	0.011587
	-6	1e-06	0.031951	0.017903	0.0108858	0.0087503	0.0173724	0.0104757		0.0258195	0.019506	0.008193	0.008126	0.015411	0.008761
	-5	1e-05	0.039184	0.0612976	0.0619802	0.0577366	0.0550497	0.0107393		0.0208539	0.019288	0.006908	0.003626	0.012669	0.008675
	-4	0.0001	0.228197	0.23231	0.202634	0.363702	0.256711	0.0725252		0.0237477	0.018508	0.005893	0.007344	0.013873	0.008666
	-3	0.001	1.60639	1.65363			1.63001	0.0333993		0.0209945	0.015528	0.00804	0.005886	0.012612	0.00695
	Converted all conc into nM
	Clindamycin samples (release of lincomycin (uM)									Clincelin samples (release of lincomycin (uM)
	log10 ATB (M)	ATB conc (M)	Rep1	Rep 2	Rep1	Rep 2	Mean	Std dev		Rep1	Rep 2	Rep1	Rep 2	Mean	Std dev
			1105.82	1102.09	166.184	184.993	639.77	536.048		1131.83	1175.73	146.197	181.716	658.868	571.939
		0	10.1543	13.6735	#VALUE!	47.0414	23.6231	20.3571		13.8415	10.5929	#VALUE!	2.02531	8.81988	6.10434
	-9	1e-09	12.5732	0.0174686	6.16908	1.52056	5.07009	5.64604		10.5324	9.5902	4.59182	2.58041	6.82372	3.84687
	-8	1e-08	11.2186	11.0923	4.41689	#VALUE!	8.90926	3.89102		26.6189	10.2008	6.12973	2.53015	11.3699	10.638
	-7	1e-07	15.2719	10.4658	6.92317	6.25403	9.72873	4.13179		29.5727	19.9493	4.92689	6.94088	15.3475	11.5873
	-6	1e-06	31.9506	17.903	10.8858	8.75031	17.3724	10.4757		25.8195	19.5057	8.19308	8.12601	15.4111	8.76114
	-5	1e-05	39.1844	61.2976	61.9802	57.7366	55.0497	10.7393		20.8539	19.2883	6.9085	3.62631	12.6693	8.6749
	-4	0.0001	228.197	232.31	202.634	363.702	256.711	72.5253		23.7477	18.508	5.89326	7.34437	13.8733	8.66588
	-3	0.001	1606.39	1653.63			1630.01	33.3993		20.9945	15.5278	8.04033	5.8858	12.6121	6.95008
	Final values for graph
		Clindamycin samples (release of lincomycin (uM)		Clincelin samples (release of lincomycin (uM)
	log10 ATB (M)	Mean	Std Dv	Mean	Std Dv
	-9	5.07009	5.64604	6.82372	3.84687
	-8	8.90926	3.89102	11.3699	10.638
	-7	9.72873	4.13179	15.3474	11.5873
	-6	17.3724	10.4757	15.4111	8.76114
	-5	55.0497	10.7393	12.6693	8.6749
	-4	256.711	72.5252	13.8733	8.66588

## Sheet: Fig. 4c
Intracellular accumulation of antibiotics
		LIN	CLI	ODC	CLC	CM	Tech. replicates average (µM)	Antibotic in 0.3 ml (nmol)	Calculated CFU/ml	CFU/sample (0.8 ml)	Accumulation (nmol /1012 CFU)
JE2_noa	C1	n.a.	n.a.	n.a.	n.a.	n.a.
JE2_noa	C1	n.a.	n.a.	n.a.	n.a.	n.a.
JE2_noa	C1	n.a.	n.a.	n.a.	n.a.	n.a.
JE2_noa	A1	n.a.	n.a.	n.a.	n.a.	n.a.
JE2_noa	A1	n.a.	n.a.	n.a.	n.a.	n.a.
JE2_noa	A1	n.a.	n.a.	n.a.	n.a.	n.a.
JE2_noa	B1	n.a.	n.a.	n.a.	n.c.	n.a.
JE2_noa	B1	n.a.	n.a.	n.a.	n.a.	n.a.
JE2_noa	B1	n.a.	n.a.	n.a.	n.a.	n.a.
JE2_noa	G1	n.a.	n.c.	n.a.	0	n.a.
JE2_noa	G1	n.a.	n.c.	n.a.	0	n.a.
JE2_noa	G1	n.a.	n.a.	n.a.	n.a.	n.a.
JE2_noa	H1	n.a.	n.a.	n.a.	n.a.	n.a.
JE2_noa	H1	n.a.	n.a.	n.a.	n.a.	n.a.
JE2_noa	H1	n.a.	n.a.	n.a.	n.a.	n.a.
JE2_noa	I1	n.a.	n.a.	n.a.	n.a.	n.a.
JE2_noa	I1	n.a.	n.a.	n.a.	n.a.	n.a.
JE2_noa	I1	n.a.	n.a.	n.a.	n.a.	n.a.
JE2_LIN	C2	0.89	n.a.	n.a.	0.04	n.a.	0.916667	0.275	38000000000	30400000000	9.04605
JE2_LIN	C2	0.9	n.a.	n.a.	0.02	n.a.
JE2_LIN	C2	0.96	n.c.	n.a.	0.02	n.a.
JE2_LIN	A2	1.01	n.c.	n.a.	0.04	n.a.	1.05	0.315	34000000000	27200000000	11.5809
JE2_LIN	A2	1.09	n.c.	n.a.	0.03	n.a.
JE2_LIN	A2	n.a.	n.a.	n.a.	n.a.	n.a.
JE2_LIN	B2	2.67	n.c.	n.a.	0.02	n.a.	2.67	0.801	34000000000	27200000000	29.4485	outlier ( ROUT; Q = 1%)
JE2_LIN	B2	2.67	n.c.	n.a.	0.02	n.a.
JE2_LIN	B2	n.a.	n.a.	n.a.	n.a.	n.a.
JE2_LIN	G2	n.a.	n.a.	n.a.	n.a.	n.a.
JE2_LIN	G2	0.92	n.c.	n.a.	n.a.	n.a.	0.92	0.276	39000000000	31200000000	8.84615
JE2_LIN	G2	n.a.	n.a.	n.a.	n.a.	n.a.
JE2_LIN	H2	n.a.	n.a.	n.a.	n.a.	n.a.
JE2_LIN	H2	n.a.	n.a.	n.a.	n.a.	n.a.
JE2_LIN	H2	n.a.	n.a.	n.a.	n.a.	n.a.
JE2_LIN	H2	n.a.	n.a.	n.a.	n.a.	n.a.
JE2_LIN	H2	0.89	n.a.	n.a.	n.a.	n.a.	0.89	0.267	40000000000	32000000000	8.34375
JE2_LIN	H2	n.a.	n.a.	n.a.	n.a.	n.a.
JE2_LIN	I2	n.a.	n.a.	n.a.	n.a.	n.a.
JE2_LIN	I2	0.88	n.a.	n.a.	n.a.	n.a.	0.88	0.264	40000000000	32000000000	8.25
JE2_LIN	I2	n.a.	n.a.	n.a.	n.a.	n.a.
JE2_CLI	C3	0.01	1.8	n.a.	n.c.	n.a.	1.81	0.543	38000000000	30400000000	17.8618
JE2_CLI	C3	0.01	1.85	n.a.	n.c.	n.a.
JE2_CLI	C3	0.01	1.78	n.a.	n.c.	n.a.
JE2_CLI	A3	0.01	1.92	n.a.	0	n.a.	1.93	0.579	34000000000	27200000000	21.2868
JE2_CLI	A3	0.01	1.89	n.a.	0	n.a.
JE2_CLI	A3	0.01	1.98	n.a.	n.c.	n.a.
JE2_CLI	B3	0.01	1.59	n.a.	0	n.a.	1.59	0.477	34000000000	27200000000	17.5368
JE2_CLI	B3	n.a.	1.63	n.a.	0	n.a.
JE2_CLI	B3	0.01	1.55	n.a.	0	n.a.
JE2_CLI	G3	0	2.39	n.a.	n.a.	n.a.	2.28	0.684	39000000000	31200000000	21.9231
JE2_CLI	G3	0	2.17	n.a.	n.a.	n.a.
JE2_CLI	G3	n.a.	n.a.	n.a.	n.a.	n.a.
JE2_CLI	H3	0.01	2.02	n.a.	n.a.	n.a.	2.1	0.63	40000000000	32000000000	19.6875
JE2_CLI	H3	0.01	2.18	n.a.	n.a.	n.a.
JE2_CLI	H3	n.a.	3.27	n.a.	n.a.	n.a.
JE2_CLI	I3	n.a.	n.a.	n.a.	n.a.	n.a.
JE2_CLI	I3	n.a.	n.a.	n.a.	n.a.	n.a.
JE2_CLI	I3	n.a.	n.a.	n.a.	n.a.	n.a.
JE2_CLI	I3	n.a.	n.a.	n.a.	n.a.	n.a.
JE2_CLI	I3	n.a.	1.77	n.a.	n.a.	n.a.	1.84	0.552	40000000000	32000000000	17.25
JE2_CLI	I3	n.a.	1.91	n.a.	n.a.	n.a.
JE2_ODC	B4	n.a.	n.a.	1.58	0	n.a.	1.58	0.474	26200000000	20960000000	22.6145
JE2_ODC	B4	n.a.	n.a.	n.a.	n.a.	n.a.
JE2_ODC	B4	n.a.	n.a.	n.a.	n.a.	n.a.
JE2_ODC	C4	0.04	n.c.	1.24	0	n.a.	1.185	0.3555	38000000000	30400000000	11.6941
JE2_ODC	C4	0.04	n.c.	1.13	0	n.a.
JE2_ODC	C4	n.a.	n.a.	n.a.	n.a.	n.a.
JE2_ODC	A4	0.03	n.c.	3.62	0	n.a.	3.43333	1.03	34000000000	27200000000	37.8676
JE2_ODC	A4	0.03	n.c.	3.54	0	n.a.
JE2_ODC	A4	0.03	n.c.	3.14	0	n.a.
JE2_ODC	B4	n.a.	n.a.	1.58	0	n.a.			34000000000	27200000000
JE2_ODC	B4	n.a.	n.a.	n.a.	n.a.	n.a.
JE2_ODC	B4	n.a.	n.a.	n.a.	n.a.	n.a.
JE2_ODC	G4	0.04	n.c.	1.6	n.a.	n.a.	1.6	0.48	39000000000	31200000000	15.3846
JE2_ODC	G4	n.a.	n.a.	n.a.	n.a.	n.a.
JE2_ODC	G4	n.a.	n.a.	n.a.	n.a.	n.a.
JE2_ODC	H4	0.05	n.a.	1.56	n.a.	n.a.	1.32	0.396	40000000000	32000000000	12.375
JE2_ODC	H4	0.05	n.a.	1.08	n.a.	n.a.
JE2_ODC	H4	n.a.	n.a.	n.a.	n.a.	n.a.
JE2_ODC	I4	n.a.	n.a.	n.a.	n.a.	n.a.			40000000000	32000000000
JE2_ODC	I4	n.a.	n.a.	n.a.	n.a.	n.a.
JE2_ODC	I4	n.a.	n.a.	n.a.	n.a.	n.a.
JE2_CLC	A5	0.02	n.c.	0.62	6.5	n.a.	6.59333	1.978	34000000000	27200000000	72.7206
JE2_CLC	A5	0.02	n.c.	0.55	6.64	n.a.
JE2_CLC	A5	0.02	n.c.	0.68	6.64	n.a.
JE2_CLC	G5	n.a.	n.a.	n.a.	n.a.	n.a.			39000000000	31200000000
JE2_CLC	G5	n.a.	n.a.	n.a.	n.a.	n.a.
JE2_CLC	G5	n.a.	n.a.	n.a.	n.a.	n.a.
JE2_CLC	H5	n.a.	n.c.	n.a.	7.76	n.a.	7.43	2.229	40000000000	32000000000	69.6562
JE2_CLC	H5	n.a.	n.c.	0.02	7.1	n.a.
JE2_CLC	H5	n.a.	n.a.	n.a.	6.14	n.a.
JE2_CLC	I5	n.a.	n.c.	0.01	8.41	n.a.	6.165	1.8495	40000000000	32000000000	57.7969
JE2_CLC	I5	n.a.	n.c.	n.a.	6.13	n.a.
JE2_CLC	I5	n.a.	n.a.	n.a.	6.2	n.a.
JE2_CLC	B5	n.a.	n.c.	n.a.	4.58	n.a.	4.58	1.374	34000000000	27200000000	50.5147
JE2_CLC	B5	n.a.	n.a.	n.a.	n.a.	n.a.
JE2_CLC	B5	n.a.	n.a.	n.a.	n.a.	n.a.
JE2_CM	A6	n.a.	n.c.	n.a.	0.26	1.29	1.41667	0.425	34000000000	27200000000	15.625
JE2_CM	A6	n.a.	n.c.	n.a.	0.15	1.42
JE2_CM	A6	n.a.	n.c.	n.a.	0.19	1.54
JE2_CM	C6	n.a.	n.c.	n.a.	0.23	1.12	1.20667	0.362	38000000000	30400000000	11.9079
JE2_CM	C6	n.a.	n.c.	n.a.	0.2	1.11
JE2_CM	C6	n.a.	n.c.	n.a.	0.2	1.39
JE2_CM	G6	n.a.	n.a.	n.a.	n.a.	n.a.			39000000000	31200000000
JE2_CM	G6	n.a.	n.a.	n.a.	n.a.	n.a.
JE2_CM	G6	n.a.	n.a.	n.a.	n.a.	n.a.
JE2_CM	H6	n.a.	n.c.	n.a.	n.c.	1.99	2.085	0.6255	40000000000	32000000000	19.5469
JE2_CM	H6	n.a.	n.c.	n.a.	0	2.18
JE2_CM	H6	n.a.	n.a.	n.a.	n.a.	n.a.
JE2_CM	I6	n.a.	n.a.	n.a.	n.c.	1.41	1.31	0.393	40000000000	32000000000	12.2813
JE2_CM	I6	n.a.	n.a.	n.a.	n.c.	1.21
JE2_CM	I6	n.a.	n.a.	n.a.	n.a.	n.a.
JE2_CM	B6	n.a.	n.a.	n.a.	0.25	1.49	1.45	0.435	34000000000	27200000000	15.9926
JE2_CM	B6	n.a.	n.a.	n.a.	0.26	1.49
JE2_CM	B6	n.a.	n.a.	n.a.	0.26	1.37
NE854_noa	D1	n.a.	n.a.	n.a.	n.a.	n.a.
NE854_noa	D1	n.a.	n.a.	n.a.	n.a.	n.a.
NE854_noa	D1	n.a.	n.a.	n.a.	n.a.	n.a.
NE854_noa	D1	n.a.	n.a.	n.a.	n.a.	n.a.
NE854_noa	E1	n.a.	n.a.	n.a.	n.a.	n.a.
NE854_noa	E1	n.a.	n.a.	n.a.	n.a.	n.a.
NE854_noa	E1	n.a.	n.a.	n.a.	n.a.	n.a.
NE854_noa	F1	n.a.	n.a.	n.a.	n.a.	n.a.
NE854_noa	F1	n.a.	n.c.	n.a.	n.a.	n.a.
NE854_noa	F1	n.a.	n.a.	n.a.	n.a.	n.a.
NE854_noa	J1	n.a.	n.a.	n.a.	n.a.	n.a.
NE854_noa	J1	n.a.	n.a.	n.a.	n.a.	n.a.
NE854_noa	J1	n.a.	n.a.	n.a.	n.a.	n.a.
NE854_noa	K1	n.a.	n.a.	n.a.	n.a.	n.a.
NE854_noa	K1	n.a.	n.a.	n.a.	n.a.	n.a.
NE854_noa	K1	n.a.	n.a.	n.a.	n.a.	n.a.
NE854_noa	L1	n.a.	n.a.	n.a.	n.a.	n.a.
NE854_noa	L1	n.a.	n.a.	n.a.	n.a.	n.a.
NE854_noa	L1	n.a.	n.a.	n.a.	n.a.	n.a.
NE854_LIN	D2	0.8	n.a.	n.a.	n.a.	n.a.	0.836667	0.251	41000000000	32800000000	7.65244
NE854_LIN	D2	0.89	n.a.	n.a.	n.a.	n.a.
NE854_LIN	D2	0.82	n.a.	n.a.	n.a.	n.a.
NE854_LIN	E2	0.74	n.a.	n.a.	n.a.	n.a.	0.763333	0.229	36000000000	28800000000	7.95139
NE854_LIN	E2	0.76	n.a.	n.a.	n.a.	n.a.
NE854_LIN	E2	0.79	n.a.	n.a.	n.c.	n.a.
NE854_LIN	F2	n.a.	n.a.	n.a.	n.a.	n.a.	0.805	0.2415	4.2e+10	3.36e+10	7.1875
NE854_LIN	F2	0.8	n.c.	n.a.	n.a.	n.a.
NE854_LIN	F2	0.81	n.c.	n.a.	n.a.	n.a.
NE854_LIN	F2	n.a.	n.a.	n.a.	n.a.	n.a.
NE854_LIN	J2	0.8	n.a.	n.a.	n.a.	n.a.	0.76	0.228	46000000000	36800000000	6.19565
NE854_LIN	J2	n.a.	n.a.	n.a.	n.a.	n.a.
NE854_LIN	J2	0.72	n.a.	n.a.	n.a.	n.a.
NE854_LIN	K2	n.a.	n.a.	n.a.	n.a.	n.a.			4.4e+10	3.52e+10	0
NE854_LIN	K2	n.a.	n.a.	n.a.	n.a.	n.a.
NE854_LIN	K2	n.a.	n.a.	n.a.	n.a.	n.a.
NE854_LIN	L2	0.68	n.a.	n.a.	n.a.	n.a.	0.7	0.21	47000000000	37600000000	5.58511
NE854_LIN	L2	0.72	n.a.	n.a.	n.a.	n.a.
NE854_LIN	L2	n.a.	n.a.	n.a.	n.a.	n.a.
NE854_CLI	D3	n.a.	n.a.	n.a.	n.a.	n.a.	1.36	0.408	41000000000	32800000000	12.439
NE854_CLI	D3	0.01	1.36	n.a.	n.a.	n.a.
NE854_CLI	D3	n.a.	n.a.	n.a.	n.a.	n.a.
NE854_CLI	E3	n.a.	1.46	n.a.	n.a.	n.a.	1.58667	0.476	36000000000	28800000000	16.5278
NE854_CLI	E3	n.a.	1.59	n.a.	n.a.	n.a.
NE854_CLI	E3	0	1.71	n.a.	n.a.	n.a.
NE854_CLI	F3	0	1.84	n.a.	0.01	n.a.	1.95	0.585	4.2e+10	3.36e+10	17.4107
NE854_CLI	F3	0	1.89	n.a.	0	n.a.
NE854_CLI	F3	0	2.12	n.a.	0	n.a.
NE854_CLI	J3	0	1.54	n.a.	n.a.	n.a.	1.51	0.453	46000000000	36800000000	12.3098
NE854_CLI	J3	0	1.48	n.a.	n.a.	n.a.
NE854_CLI	J3	n.a.	n.a.	n.a.	n.a.	n.a.
NE854_CLI	K3	0	1.65	n.a.	n.a.	n.a.	1.78	0.534	4.4e+10	3.52e+10	15.1705
NE854_CLI	K3	0	1.81	n.a.	n.a.	n.a.
NE854_CLI	K3	0	1.88	n.a.	n.a.	n.a.
NE854_CLI	L3	0	1.89	n.a.	n.a.	n.a.	1.925	0.5775	47000000000	37600000000	15.359
NE854_CLI	L3	0	1.96	n.a.	n.a.	n.a.
NE854_CLI	L3	n.a.	n.a.	n.a.	n.a.	n.a.
NE854_ODC	D4	0.04	n.c.	1.18	0	n.a.	1.195	0.3585	41000000000	32800000000	10.9299
NE854_ODC	D4	0.04	n.c.	1.21	n.c.	n.a.
NE854_ODC	D4	n.a.	n.a.	n.a.	n.a.	n.a.
NE854_ODC	E4	0.04	n.a.	1.02	n.a.	n.a.	0.903333	0.271	36000000000	28800000000	9.40972
NE854_ODC	E4	0.03	n.a.	0.79	n.a.	n.a.
NE854_ODC	E4	0.03	n.a.	0.9	n.a.	n.a.
NE854_ODC	F4	0.04	n.a.	1.1	n.c.	n.a.	1.16	0.348	4.2e+10	3.36e+10	10.3571
NE854_ODC	F4	0.04	n.a.	1.22	n.a.	n.a.
NE854_ODC	F4	0.04	n.a.	1.9	n.a.	n.a.
NE854_ODC	J4	0.06	n.a.	1.66	0.0002	n.a.	1.685	0.5055	46000000000	36800000000	13.7364
NE854_ODC	J4	0.06	n.a.	1.71	0.0002	n.a.
NE854_ODC	J4	n.a.	n.a.	n.a.	n.a.	n.a.
NE854_ODC	K4	0.03	n.a.	1.04	n.c.	n.a.	1.11333	0.334	4.4e+10	3.52e+10	9.48864
NE854_ODC	K4	0.03	n.a.	1.24	n.a.	n.a.
NE854_ODC	K4	0.04	n.a.	1.06	n.a.	n.a.
NE854_ODC	L4	n.a.	n.a.	n.a.	n.a.	n.a.	1.605	0.4815	47000000000	37600000000	12.8059
NE854_ODC	L4	0.04	n.c.	1.49	0.0007	n.a.
NE854_ODC	L4	0.04	n.a.	1.72	0.0006	n.a.
NE854_CLC	D5	n.a.	n.c.	n.a.	8.31	n.a.	7.38	2.214	41000000000	32800000000	67.5
NE854_CLC	D5	n.a.	n.c.	n.a.	6.45	n.a.
NE854_CLC	D5	n.a.	n.a.	n.a.	n.a.	n.a.
NE854_CLC	E5	n.a.	n.c.	n.a.	6.29	n.a.	7.27	2.181	36000000000	28800000000	75.7292
NE854_CLC	E5	n.a.	n.c.	n.a.	7.46	n.a.
NE854_CLC	E5	n.a.	n.a.	n.a.	7.08	n.a.
NE854_CLC	F5	n.a.	n.c.	0.45	9.32	n.a.	9.28667	2.786	4.2e+10	3.36e+10	82.9167
NE854_CLC	F5	n.a.	n.c.	0.37	9.49	n.a.
NE854_CLC	F5	n.a.	n.c.	0.35	9.05	n.a.
NE854_CLC	J5	n.a.	n.c.	n.a.	7.03	n.a.	6.82	2.046	46000000000	36800000000	55.5978
NE854_CLC	J5	n.a.	n.a.	n.a.	3.82	n.a.
NE854_CLC	J5	n.a.	n.c.	n.a.	6.61	n.a.
NE854_CLC	K5	n.a.	n.c.	n.a.	8.69	n.a.	6.69	2.007	4.4e+10	3.52e+10	57.017
NE854_CLC	K5	n.a.	n.c.	n.a.	6.37	n.a.
NE854_CLC	K5	n.a.	n.c.	n.a.	7.01	n.a.
NE854_CLC	L5	n.a.	n.c.	0.18	7.74	n.a.	7.61	2.283	47000000000	37600000000	60.7181
NE854_CLC	L5	n.a.	n.c.	0.07	7.48	n.a.
NE854_CLC	L5	n.a.	n.a.	n.a.	n.a.	n.a.
NE854_CM	D6	n.a.	n.a.	n.a.	0	1.78	1.78333	0.535	41000000000	32800000000	16.311
NE854_CM	D6	n.a.	n.a.	n.a.	n.c.	1.87
NE854_CM	D6	n.a.	n.a.	n.a.	n.c.	1.7
NE854_CM	E6	n.a.	n.a.	n.a.	n.a.	n.a.	1.84	0.552	36000000000	28800000000	19.1667
NE854_CM	E6	n.a.	n.a.	n.a.	n.a.	1.84
NE854_CM	E6	n.a.	n.a.	n.a.	n.a.	n.a.
NE854_CM	F6	n.a.	n.a.	n.a.	n.c.	1.57	1.57333	0.472	4.2e+10	3.36e+10	14.0476
NE854_CM	F6	n.a.	n.a.	n.a.	n.c.	1.47
NE854_CM	F6	n.a.	n.a.	n.a.	n.a.	1.68
NE854_CM	J6	n.a.	n.a.	n.a.	n.a.	1.41	1.31	0.393	46000000000	36800000000	10.6793
NE854_CM	J6	n.a.	n.a.	n.a.	n.a.	1.21
NE854_CM	J6	n.a.	n.a.	n.a.	n.a.	n.a.
NE854_CM	K6	n.a.	n.a.	n.a.	0	1.8	1.72667	0.518	4.4e+10	3.52e+10	14.7159
NE854_CM	K6	n.a.	n.a.	n.a.	n.c.	1.66
NE854_CM	K6	n.a.	n.a.	n.a.	n.c.	1.72
NE854_CM	L6	n.a.	n.a.	n.a.	n.c.	1.21	1.21	0.363	47000000000	37600000000	9.65426
NE854_CM	L6	n.a.	n.a.	n.a.	n.a.	n.a.
NE854_CM	L6	n.a.	n.a.	n.a.	n.a.	n.a.

## Sheet: Fig. 4c stat
Column B	JE2_CLI		Column C	JE2_ODC		Column D	JE2_CLC
vs.	vs,		vs.	vs,		vs.	vs,
Column A	JE2_LIN		Column A	JE2_LIN		Column B	JE2_CLI
Paired t test			Paired t test			Paired t test
P value	0.0002		P value	0.172		P value	0.0021
P value summary	***		P value summary	ns		P value summary	**
Significantly different (P < 0.05)?	Yes		Significantly different (P < 0.05)?	No		Significantly different (P < 0.05)?	Yes
One- or two-tailed P value?	Two-tailed		One- or two-tailed P value?	Two-tailed		One- or two-tailed P value?	Two-tailed
t, df	t=12,88, df=4		t, df	t=1,786, df=3		t, df	t=10,12, df=3
Number of pairs	5		Number of pairs	4		Number of pairs	4
How large is the effect?			How large is the effect?			How large is the effect?
Mean of differences (B - A)	10.39		Mean of differences (C - A)	9.876		Mean of differences (D - B)	43.73
SD of differences	1.803		SD of differences	11.06		SD of differences	8.641
SEM of differences	0.8065		SEM of differences	5.529		SEM of differences	4.321
95% confidence interval	8,149 to 12,63		95% confidence interval	-7,720 to 27,47		95% confidence interval	29,98 to 57,48
R squared (partial eta squared)	0.9765		R squared (partial eta squared)	0.5154		R squared (partial eta squared)	0.9716
How effective was the pairing?			How effective was the pairing?			How effective was the pairing?
Correlation coefficient (r)	0.5023		Correlation coefficient (r)	0.9727		Correlation coefficient (r)	0.9145
P value (one tailed)	0.1942		P value (one tailed)	0.0137		P value (one tailed)	0.0427
P value summary	ns		P value summary	*		P value summary	*
Was the pairing significantly effective?	No		Was the pairing significantly effective?	Yes		Was the pairing significantly effective?	Yes
Column G	NE854_CLI		Column H	NE854_ODC		Column I	NE854_CLC
vs.	vs,		vs.	vs,		vs.	vs,
Column F	NE854_LIN		Column F	NE854_LIN		Column G	NE854_CLI
Paired t test			Paired t test			Paired t test
P value	0.0017		P value	0.0199		P value	<0,0001
P value summary	**		P value summary	*		P value summary	****
Significantly different (P < 0.05)?	Yes		Significantly different (P < 0.05)?	Yes		Significantly different (P < 0.05)?	Yes
One- or two-tailed P value?	Two-tailed		One- or two-tailed P value?	Two-tailed		One- or two-tailed P value?	Two-tailed
t, df	t=7,485, df=4		t, df	t=3,754, df=4		t, df	t=13,12, df=5
Number of pairs	5		Number of pairs	5		Number of pairs	6
How large is the effect?			How large is the effect?			How large is the effect?
Mean of differences (G - F)	7.895		Mean of differences (H - F)	4.533		Mean of differences (I - G)	51.71
SD of differences	2.358		SD of differences	2.7		SD of differences	9.656
SEM of differences	1.055		SEM of differences	1.207		SEM of differences	3.942
95% confidence interval	4,966 to 10,82		95% confidence interval	1,181 to 7,886		95% confidence interval	41,58 to 61,84
R squared (partial eta squared)	0.9334		R squared (partial eta squared)	0.779		R squared (partial eta squared)	0.9718
How effective was the pairing?			How effective was the pairing?			How effective was the pairing?
Correlation coefficient (r)	0.1938		Correlation coefficient (r)	-0.8786		Correlation coefficient (r)	0.6698
P value (one tailed)	0.3774		P value (one tailed)	0.0249		P value (one tailed)	0.0728
P value summary	ns		P value summary	*		P value summary	ns
Was the pairing significantly effective?	No		Was the pairing significantly effective?	Yes		Was the pairing significantly effective?	No

## Sheet: Fig. 4d
Source data for Fig. 4D. Uncropped gels

## Sheet: Fig. 4e
Source data for Fig. 4E. Uncropped gels

## Sheet: ExDataFig. 5a,b
Source data for Extended Data Fig. 5A, B. Uncropped gels

[truncated: 1 more sheets: ExDataFig. 6c]
